# Supplementary material
Source: PubMed Central journal article supplement (PMC8832882)
Supplement: NIHMS1775549-supplement-Supplementary_Notes.pdf [file NIHMS1775549-supplement-Supplementary_Notes.pdf]

**Supplementary information**

---

**FoGS provides a public FAQ repository for social and behavioral genomic discoveries**

---

In the format provided by the authors and unedited

### **Supplementary Note 1**

Over the five-year period of 2013-2017, our search identified six genomic studies with accompanying FAQs (three of which were published in 2016). In the period after 2017, thirteen additional FAQs emerged. Seven of the GWAS covered in the repository's FAQs were published in Nature Genetics with the remaining published in Nature Communications (n=1), Cell (n=1), Communications Biology (n=1), Current Biology (n=1), Molecular Psychiatry (n=1), npj Science and Learning (n=1), PNAS (n=1), Psychological Science (n=1), and Science (n=2); one GWAS is currently in pre-print and another is part of an ongoing study.

### **Supplementary Note 2**

Five of the FAQs in FoGS were written by the Social Science Genetic Association Consortium (SSGAC). More than half (eight) of the remaining FAQs have corresponding authors residing at US institutions. The remaining five FAQs have corresponding authors affiliated with academic institutions in the UK and the Netherlands.

All but five corresponding-authors are male (73.7% male), reflecting gender disparities in STEM and NIH funding.<sup>7</sup> Of note is the highly collaborative and international nature of genomic studies on social and behavioral outcomes. For instance, a 2019 GWAS on same-sex sexual behavior lists 19 authors from around the world<sup>8</sup> and the SSGAC's 2018 GWAS on educational-attainment has 77 international authors.<sup>9</sup>

### **Supplementary Note 3**

The submission guidelines for FoGS were developed with support from librarians at the Lane Medical Library at Stanford University who have experience with the formation of

repositories and subsequent guidelines for inclusion. The guidelines favorably consider submissions related to publications in established peer-reviewed journals because the academic peer-review process provides an additional check on whether a prospective entry pertains to relevant, ethical, rigorous, and original scientific research that is of scientific importance in human genetics/genomics. Favorably considering submissions related to publications in established peer-reviewed journals is not meant to exclude FAQs that accompany pre-prints. At the time of this publication, FoGS includes FAQ materials that accompany pre-print publications.
